# Supplementary material
Source: MDPI journal article supplement (https://www.mdpi.com/2075-5309/9/6/150)
Supplement: s1 [file s1]

Please fill in the spaces provided or tick where applicable.

### Section I- General Information

1. Please state the name of the company you are employed with (optional)

2. Please state your position at the organisation \_\_\_\_\_

3. What type of construction works does your organisation usually undertake? If other please state in the space provided.

☐ General      ☐ Building      ☐ Infrastructure      ☐ MEP (Mechanical, Electrical, Plumbing)

☐ Other: \_\_\_\_\_

4. The majority of works executed by your company are for which of the following employers?

☐ Public Sector      ☐ Private Sector      ☐ Not sure

5. What size of firm is your organisation classified as?

☐ Micro (\$500K - \$1M Annual Turnover)      ☐ Small (>\$1M - \$5M Annual Turnover)

☐ Medium (>\$5M - \$15M Annual Turnover) ☐ Large (>\$15M Annual Turnover)

☐ Not sure

6. How many years have you been working in the construction industry?

☐ 1-5 years      ☐ 6-10 years      ☐ 10-15 years      ☐ more than 15 years

7. What is the highest degree or level of school you have completed?

☐ Primary ☐ Secondary      ☐ Trade/Technical      ☐ Diploma

☐ Bachelor's      ☐ Master's      ☐ Doctorate      ☐ Other: \_\_\_\_\_

☐ Yes      ☐ No

### Section II- Sources and Types of Waste

8. Please indicate your level of agreement with which of the following materials are the most wasted on your construction sites.

| Material        | Strongly Agree           | Agree                    | Neutral                  | Disagree                 | Strongly Disagree        |
|-----------------|--------------------------|--------------------------|--------------------------|--------------------------|--------------------------|
| Asphalt         | <input type="checkbox"/> |
| Concrete        | <input type="checkbox"/> |
| Steel           | <input type="checkbox"/> |
| Brick and Block | <input type="checkbox"/> |
| Insulation      | <input type="checkbox"/> |
| Glass           | <input type="checkbox"/> |
| Ceramic         | <input type="checkbox"/> |
| Aluminium       | <input type="checkbox"/> |
| Plastic         | <input type="checkbox"/> |
| Paint           | <input type="checkbox"/> |

|              |                          |                          |                          |                          |                          |
|--------------|--------------------------|--------------------------|--------------------------|--------------------------|--------------------------|
| Wood         | <input type="checkbox"/> |
| Gypsum Board | <input type="checkbox"/> |
| Cardboard    | <input type="checkbox"/> |
| Other:       |                          |                          |                          |                          |                          |

9. Please indicate your level of agreement with the following as the primary cause of waste generation on your construction sites.

| <b>Cause</b>                                          | <b>Strongly Agree</b>    | <b>Agree</b>             | <b>Neutral</b>           | <b>Disagree</b>          | <b>Strongly Disagree</b> |
|-------------------------------------------------------|--------------------------|--------------------------|--------------------------|--------------------------|--------------------------|
| Incomplete design                                     | <input type="checkbox"/> |
| Errors in tender documents                            | <input type="checkbox"/> |
| Change of design                                      | <input type="checkbox"/> |
| Errors in ordering materials                          | <input type="checkbox"/> |
| Material suppliers' error                             | <input type="checkbox"/> |
| Poor storage of materials                             | <input type="checkbox"/> |
| Transportation damage                                 | <input type="checkbox"/> |
| Errors by workers on site                             | <input type="checkbox"/> |
| Equipment malfunction                                 | <input type="checkbox"/> |
| Severe weather conditions                             | <input type="checkbox"/> |
| Accidents on site                                     | <input type="checkbox"/> |
| Incorrect use of material                             | <input type="checkbox"/> |
| Wastage due to cutting                                | <input type="checkbox"/> |
| Overmixing of materials                               | <input type="checkbox"/> |
| Wastage due to application process                    | <input type="checkbox"/> |
| Wastage due to theft                                  | <input type="checkbox"/> |
| Lack of onsite materials control and management plans | <input type="checkbox"/> |
| Other:                                                | <input type="checkbox"/> |

### **Section III- Waste Management Actions which can be Performed.**

10. Please indicate which of the following waste management actions are currently being utilized on your construction sites to deal with the respective waste. (Multiple actions may be selected)

| <b>Material Waste</b> | <b>Recycle/Reuse</b>     | <b>Composting</b>        | <b>Incineration</b>      | <b>Landfilling</b>       |
|-----------------------|--------------------------|--------------------------|--------------------------|--------------------------|
| Asphalt               | <input type="checkbox"/> | <input type="checkbox"/> | <input type="checkbox"/> | <input type="checkbox"/> |
| Concrete              | <input type="checkbox"/> | <input type="checkbox"/> | <input type="checkbox"/> | <input type="checkbox"/> |
| Steel                 | <input type="checkbox"/> | <input type="checkbox"/> | <input type="checkbox"/> | <input type="checkbox"/> |

|                       |                          |                          |                          |                          |
|-----------------------|--------------------------|--------------------------|--------------------------|--------------------------|
| Brick and Block       | <input type="checkbox"/> | <input type="checkbox"/> | <input type="checkbox"/> | <input type="checkbox"/> |
| Insulation            | <input type="checkbox"/> | <input type="checkbox"/> | <input type="checkbox"/> | <input type="checkbox"/> |
| <b>Material Waste</b> | <b>Recycle/Reuse</b>     | <b>Composting</b>        | <b>Incineration</b>      | <b>Landfilling</b>       |
| Glass                 | <input type="checkbox"/> | <input type="checkbox"/> | <input type="checkbox"/> | <input type="checkbox"/> |
| Ceramic               | <input type="checkbox"/> | <input type="checkbox"/> | <input type="checkbox"/> | <input type="checkbox"/> |
| Aluminium             | <input type="checkbox"/> | <input type="checkbox"/> | <input type="checkbox"/> | <input type="checkbox"/> |
| Plastic               | <input type="checkbox"/> | <input type="checkbox"/> | <input type="checkbox"/> | <input type="checkbox"/> |
| Paint                 | <input type="checkbox"/> | <input type="checkbox"/> | <input type="checkbox"/> | <input type="checkbox"/> |
| Wood                  | <input type="checkbox"/> | <input type="checkbox"/> | <input type="checkbox"/> | <input type="checkbox"/> |
| Gypsum Board          | <input type="checkbox"/> | <input type="checkbox"/> | <input type="checkbox"/> | <input type="checkbox"/> |
| Cardboard             | <input type="checkbox"/> | <input type="checkbox"/> | <input type="checkbox"/> | <input type="checkbox"/> |
| Other:                | <input type="checkbox"/> | <input type="checkbox"/> | <input type="checkbox"/> | <input type="checkbox"/> |

11. Please indicate your level of agreement whether each of the material waste has good potential for recycle/reuse in Trinidad and Tobago.

| <b>Material</b> | <b>Strongly Agree</b>    | <b>Agree</b>             | <b>Neutral</b>           | <b>Disagree</b>          | <b>Strongly Disagree</b> |
|-----------------|--------------------------|--------------------------|--------------------------|--------------------------|--------------------------|
| Asphalt         | <input type="checkbox"/> |
| Concrete        | <input type="checkbox"/> |
| Steel           | <input type="checkbox"/> |
| Brick and Block | <input type="checkbox"/> |
| Insulation      | <input type="checkbox"/> |
| Glass           | <input type="checkbox"/> |
| Ceramic         | <input type="checkbox"/> |
| Aluminium       | <input type="checkbox"/> |
| Plastic         | <input type="checkbox"/> |
| Paint           | <input type="checkbox"/> |
| Wood            | <input type="checkbox"/> |
| Gypsum Board    | <input type="checkbox"/> |
| Cardboard       | <input type="checkbox"/> |
| Other:          | <input type="checkbox"/> |

#### **Section IV- Potential Benefits of C&D Waste Management and Barriers to Implementation.**

12. Please indicate your level of agreement with the advantages of Construction and Demolition Waste Management.

| <b>Advantage</b>                                             | <b>Strongly Agree</b>    | <b>Agree</b>             | <b>Neutral</b>           | <b>Disagree</b>          | <b>Strongly Disagree</b> |
|--------------------------------------------------------------|--------------------------|--------------------------|--------------------------|--------------------------|--------------------------|
| Increased longevity of landfills                             | <input type="checkbox"/> |
| Purchase cost savings due to reduced wastage of materials    | <input type="checkbox"/> |
| Improved resource efficiency                                 | <input type="checkbox"/> |
| Waste disposal savings                                       | <input type="checkbox"/> |
| Reduction in negative environmental impacts due to waste     | <input type="checkbox"/> |
| Reduction in public health and social issues caused by waste | <input type="checkbox"/> |
| Other:                                                       | <input type="checkbox"/> |

13. Do you believe that Sustainability and Sustainable Development are major benefits of proper and effective implementation of C&D Waste Management?

☐ Yes

☐ No

14. Please indicate your level of agreement with the factors that may hinder the implementation of C&D Waste Management techniques and practices in Trinidad and Tobago.

| <b>Factor</b>                                                                       | <b>Strongly Agree</b>    | <b>Agree</b>             | <b>Neutral</b>           | <b>Disagree</b>          | <b>Strongly Disagree</b> |
|-------------------------------------------------------------------------------------|--------------------------|--------------------------|--------------------------|--------------------------|--------------------------|
| Congestion on construction sites                                                    | <input type="checkbox"/> |
| Lack of ownership of waste on sites due to multiple contractors and sub-contractors | <input type="checkbox"/> |
| Lack of education and awareness of C&D Waste Management                             | <input type="checkbox"/> |
| No penalties for poor waste management practices                                    | <input type="checkbox"/> |
| No incentives offered for practicing C&D Waste Management                           | <input type="checkbox"/> |
| Perception that there is no net benefit from implementing C&D Waste Management      | <input type="checkbox"/> |
| C&D Waste Management is too costly to implement                                     | <input type="checkbox"/> |
| Lack of material recycling facilities                                               | <input type="checkbox"/> |
| <b>Factor</b>                                                                       | <b>Strongly Agree</b>    | <b>Agree</b>             | <b>Neutral</b>           | <b>Disagree</b>          | <b>Strongly Disagree</b> |
| Lack of implementation of Green Building Codes and Specifications                   | <input type="checkbox"/> |

|                                                                   |                          |                          |                          |                          |                          |
|-------------------------------------------------------------------|--------------------------|--------------------------|--------------------------|--------------------------|--------------------------|
| Poor legislation and policies relating to waste management in T&T | <input type="checkbox"/> |
| Lack of enforcement of waste management legislation and policies  | <input type="checkbox"/> |
| Lack of implementation frameworks and guidelines                  | <input type="checkbox"/> |
| Designers do not design with waste management in mind             | <input type="checkbox"/> |
| Lack of support of C&D Waste Management by Clients                | <input type="checkbox"/> |
| Other:                                                            | <input type="checkbox"/> |

15. Please indicate your level of agreement with which of the following can help with increasing the utilization of C&D Waste Management in Trinidad and Tobago?

|                                                                                | <b>Strongly Agree</b>    | <b>Agree</b>             | <b>Neutral</b>           | <b>Disagree</b>          | <b>Strongly Disagree</b> |
|--------------------------------------------------------------------------------|--------------------------|--------------------------|--------------------------|--------------------------|--------------------------|
| Increased support of C&D Waste Management from Clients                         | <input type="checkbox"/> |
| Increased implementation of Green Building Codes, Standards and Specifications | <input type="checkbox"/> |
| Increased landfill charges                                                     | <input type="checkbox"/> |
| Introduction of penalties for poor waste management practices                  | <input type="checkbox"/> |
| Offering of incentives and tender premiums related to waste management         | <input type="checkbox"/> |
| Increased awareness and dissemination of knowledge about C&D Waste Management  | <input type="checkbox"/> |
| Other:                                                                         | <input type="checkbox"/> |

16. General comments/remarks on the topic of C&D Waste Management.

---



---



---

**End of Questionnaire**
